# Supplementary material
Source: MDPI journal article supplement (https://www.mdpi.com/2076-3417/11/5/1976)
Supplement: s1 [file s1]

# Supplementary File

## Annex 1

### Full list of eligibility, inclusion, exclusion, and exit criteria

#### Eligibility criteria:

- A. Clinical history and lifestyle data records available at one-time point.
- B. At least one previous CCTA examination performed for suspected Coronary heart disease (CHD) and of good quality to allow for: a) non-invasive FFR-CT assessment b) quantitative (automated) 17 segments (American Heart Association (AHA)) analysis and measurement with  $\leq 10\%$  error of minimum lumen diameter (MLA) ( $\text{mm}^2$ ), lumen area stenosis (%), mean plaque burden ( $\text{mm}^3$ ), plaque burden at MLA (%), and remodeling index, c) plaque phenotype assessment: Hausfield units (HU) based classification in calcified, non-calcified and mixed, napkin-ring sign, coronary artery calcium (CAC) score.
- C. Previous blood and plasma sample available for retrospective analysis.

#### Inclusion criteria:

- 1) Male and female subjects.
- 2) Aged 45–82 years.
- 3) Caucasian population.
- 4) Submitted to CCTA for suspected CHD between 2009 and 2012 (in the context of EVINCI and ARTreat FPVII studies) at the hospitals reported in “SMARTool Clinical Center” document and satisfying the eligibility criteria reported above.
- 5) Submitted to clinical follow-up in the last 6 months with stable clinical conditions and documented CHD or persistent intermediate/high probability of CHD.
- 6) Signed informed consents (clinical and genetic).

#### Exclusion criteria:

- 1) Multi-vessel severe disease (three vessels and/or left main (LM) disease with  $>90\%$  stenosis).
- 2) Severe coronary calcification (CAC score  $> 600$ ).
- 3) Having undergone surgical procedures related to heart diseases (valve replacement, Cardiac resynchronization therapy (CRT) or CRT-D treatment, any surgery of the heart or arteries).
- 4) Documented Major adverse cardiovascular events (MACE) at history (myocardial infarction, severe heart failure, recurrent angina) in the last 6 months with/without revascularization.
- 5) Documented severe peripheral vascular disease (carotid, femoral).
- 6) Surgery of carotid and/or peripheral arteries or cerebral ischemic attack.
- 7) History/surgery of abdominal aortic aneurysm (AAA).
- 8) Severe heart failure (New York Heart Association (NYHA) Class III–IV).
- 9) LV dysfunction (left ventricle Ejection fraction (EF)  $< 40\%$ ).
- 10) Atrial fibrillation.
- 11) Lack of written informed consent (clinical consent and/or genetic consent).
- 12) Pregnancy (evaluated by urine test) and breastfeeding.
- 13) Active cancer.
- 14) Asthma.
- 15) Cardiomyopathy or congenital heart disease.
- 16) Significant valvular disease (hemodynamically significant valvular stenosis or insufficiency by echo-Doppler).
- 17) Renal dysfunction (creatinine  $> 1.3 \text{ mg/dL}$ ).

- 18) Chronic kidney disease (Estimated Glomerular Filtration Rate (eGFR) < 30 mL/min/1.73 m<sup>2</sup>).
- 19) Hepatic failure (at least three of the following: albumin < 3.5 g/dL; prolonged prothrombin time (PT); jaundice; ascites).
- 20) Waldenström's disease.
- 21) Multiple myeloma.
- 22) Autoimmune/acute inflammatory disease.
- 23) Previous severe adverse reaction to iodine contrast agent.
- 24) Positivity at blood tests for HIV, Hepatitis B and C.

**Exit Criteria:**

- A) Informed consent retired by the patient (genetic or clinical).
- B) Adverse events to contrast medium during C.

**Annex 2. Lipids structures**

Lipid Class: CE (cholesteryl esters)

CE\_R\_I

R: total number of carbon atoms in the acyl chains.

I: total number of double bonds in the acyl chains.

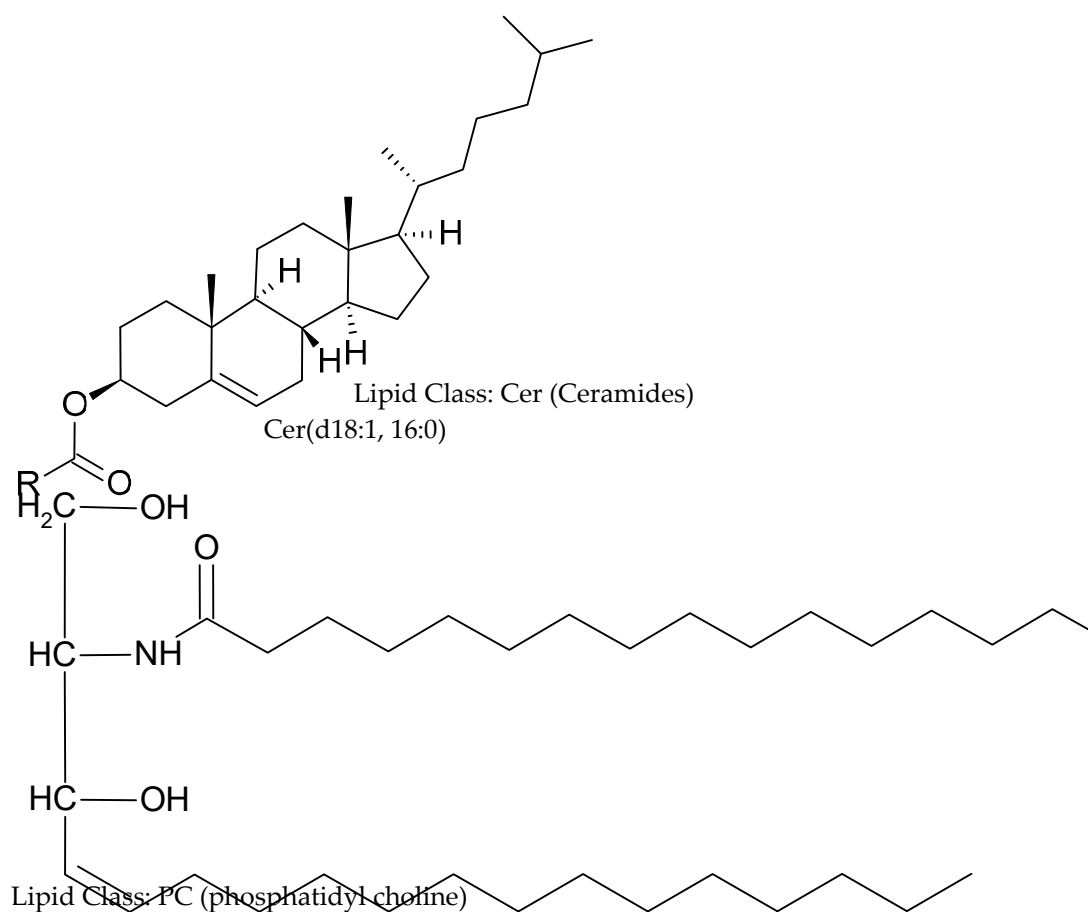

PC\_R\_I

R: total number of carbon atoms in the acyl chains.

I: total number of double bonds in the acyl chains.

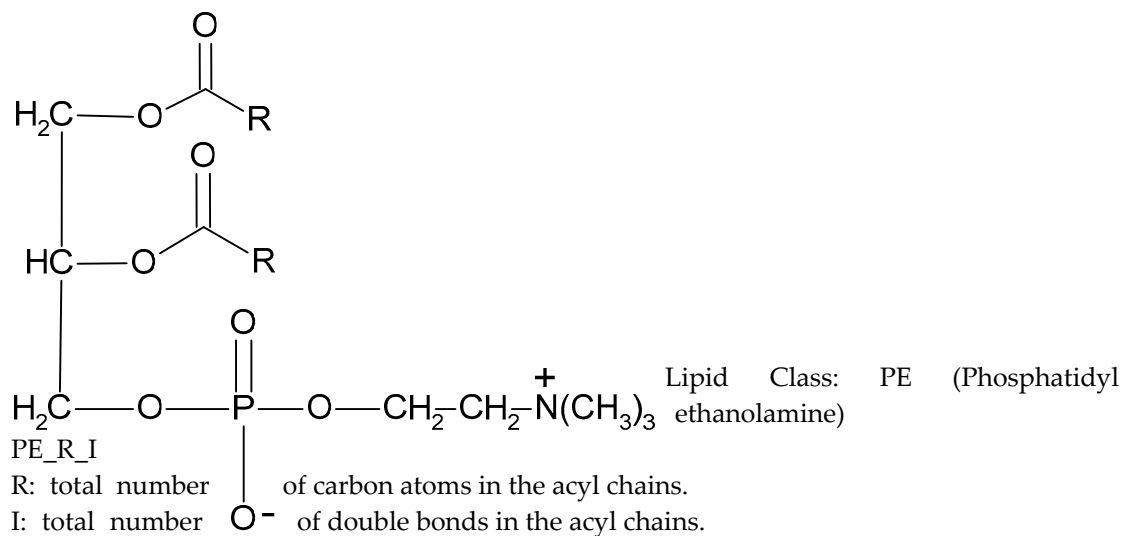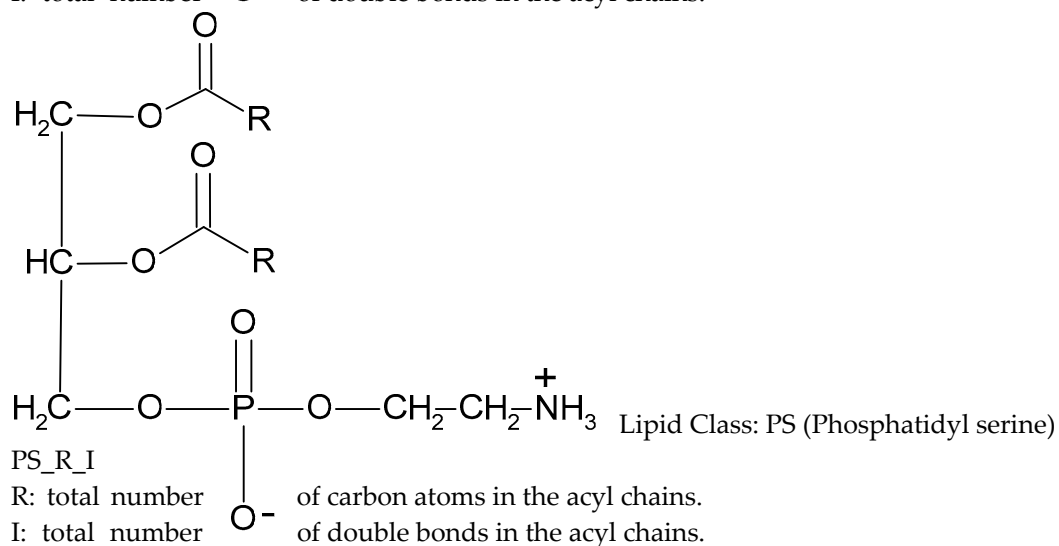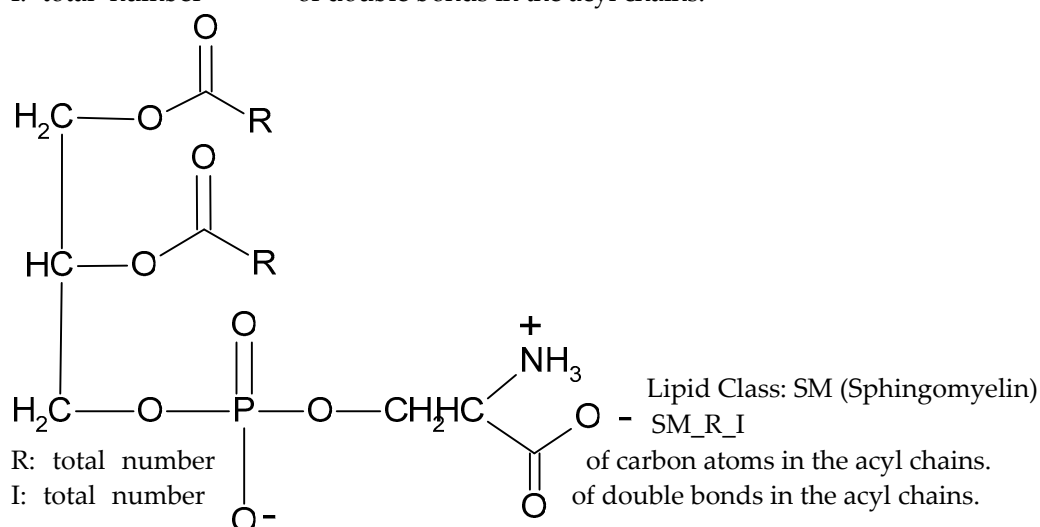

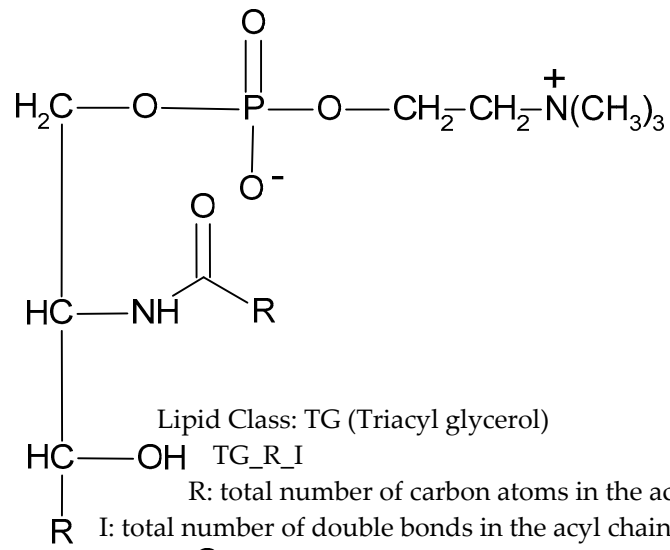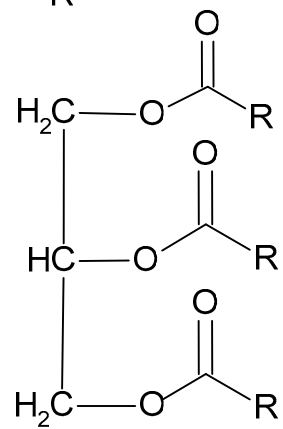

**Table S1.** Univariate and multivariate linear regression analysis for association of relevant baseline clinical/biohumoral and CCTA variables with single components of plaque progression and their combination.

| Dependent Variable            | Effect                 | Univariate Linear Regression Analysis     |          | Multivariate Linear Regression Analysis   |          |
|-------------------------------|------------------------|-------------------------------------------|----------|-------------------------------------------|----------|
|                               |                        | Estimated Regression Coefficient (95% CI) | p-Value  | Estimated Regression Coefficient (95% CI) | p-Value  |
| Plaque area increase by 20%   | Age                    | 0.007 (0.002 to 0.013)                    | 0.0140   | 0.012 (0.005 to 0.020)                    | 0.0020   |
|                               | Cer_d18_1_18_0         | -0.997 (-2.174 to 0.181)                  | 0.0964   | -0.001 (-0.004 to 0.003)                  | 0.7714   |
|                               | CE_18_3                | 0.002 (-0.000 to 0.004)                   | 0.0769   | 0.002 (-0.006 to 0.011)                   | 0.5850   |
|                               | CE_20_3                | 0.006 (-0.000 to 0.011)                   | 0.0513   | 0.001 (-0.002 to 0.003)                   | 0.6043   |
|                               | SM_42_1                | 0.003 (0.000 to 0.006)                    | 0.0265   | 0.003 (-0.001 to 0.006)                   | 0.1017   |
|                               | Baseline plaque burden | -0.008 (-0.009 to -0.007)                 | < 0.0001 | -0.008 (-0.010 to -0.007)                 | < 0.0001 |
|                               | Minimum ESS            | 0.026 (0.008 to 0.044)                    | 0.0046   | 0.079 (0.056 to 0.102)                    | < 0.0001 |
|                               | SmartFFR               | 0.315 (0.053 to 0.576)                    | 0.0187   | 0.035 (-0.308 to 0.378)                   | 0.8405   |
| Plaque burden increase by 20% | Age                    | 0.007 (0.001 to 0.013)                    | 0.0155   | 0.012 (0.004 to 0.019)                    | 0.0020   |
|                               | CE_18_3                | 0.002 (-0.000 to 0.004)                   | 0.0968   | -0.001 (-0.004 to 0.003)                  | 0.6732   |
|                               | CE_20_3                | 0.005 (-0.000 to 0.011)                   | 0.0559   | 0.003 (-0.006 to 0.011)                   | 0.5504   |
|                               | TG_54_2__TG_18_1_18_   | 0.002 (-0.000 to 0.004)                   | 0.0950   | 0.001 (-0.001 to 0.003)                   | 0.4964   |
|                               | SM_42_1                | 0.003 (0.000 to 0.006)                    | 0.0280   | 0.003 (-0.001 to 0.006)                   | 0.0980   |
|                               | Baseline plaque burden | -0.009 (-0.010 to -0.007)                 | < 0.0001 | -0.008 (-0.009 to -0.006)                 | < 0.0001 |
|                               | Minimum ESS            | 0.016 (-0.002 to 0.034)                   | 0.0750   | 0.064 (0.041 to 0.086)                    | < 0.0001 |
|                               | SmartFFR               | 0.321 (0.068 to 0.574)                    | 0.0129   | 0.042 (-0.293 to 0.377)                   | 0.8053   |

**Table S2.** Univariate and multivariate binary logistic regression analysis for the plaque progression and lumen area decrease.

| Dependent Variable            | Effect                      | Univariate Logistic Regression Analysis |          | Multivariate Logistic Regression Analysis |          |
|-------------------------------|-----------------------------|-----------------------------------------|----------|-------------------------------------------|----------|
|                               |                             | Odds Ratio                              | p-Value  | Odds Ratio                                | p-Value  |
| Plaque area increase by 20%   | Age                         | 1.035 (1.007 to 1.064)                  | 0.0141   | 1.071 (1.035 to 1.108)                    | < 0.0001 |
|                               | Cer_d18_1_16_0              | 1.159 (1.056 to 1.273)                  | 0.0020   | 1.005 (0.873 to 1.158)                    | 0.9438   |
|                               | CE_18_3                     | 1.008 (1.000 to 1.016)                  | 0.0372   | 1.003 (0.986 to 1.020)                    | 0.7170   |
|                               | CE_20_3                     | 1.025 (1.002 to 1.048)                  | 0.0320   | 1.006 (0.969 to 1.045)                    | 0.7452   |
|                               | PC_36_0                     | 1.038 (0.996 to 1.082)                  | 0.0778   | 1.008 (0.943 to 1.076)                    | 0.8210   |
|                               | PC_36_2e__PC_36_1p          | 1.080 (0.986 to 1.183)                  | 0.0982   | 1.149 (0.931 to 1.419)                    | 0.1955   |
|                               | TG_54_2__TG_18_1_18_1_1_8_0 | 1.008 (1.000 to 1.015)                  | 0.0395   | 1.007 (0.998 to 1.017)                    | 0.1417   |
|                               | SM_38_1                     | 1.018 (1.001 to 1.036)                  | 0.0373   | 1.012 (0.956 to 1.071)                    | 0.6738   |
|                               | SM_40_3                     | 1.099 (0.983 to 1.229)                  | 0.0982   | 1.147 (0.809 to 1.626)                    | 0.4420   |
|                               | SM_40_2                     | 1.012 (0.998 to 1.026)                  | 0.0926   | 1.004 (0.947 to 1.064)                    | 0.8928   |
|                               | SM_41_1                     | 1.013 (1.000 to 1.026)                  | 0.0478   | 1.014 (0.980 to 1.050)                    | 0.4292   |
|                               | SM_42_4                     | 1.124 (1.018 to 1.242)                  | 0.0211   | 1.223 (0.927 to 1.613)                    | 0.1536   |
|                               | SM_42_1                     | 1.014 (1.003 to 1.025)                  | 0.0161   | 1.025 (1.001 to 1.051)                    | 0.0451   |
|                               | Baseline plaque burden      | 1.049 (1.039 to 1.060)                  | < 0.0001 | 1.052 (1.037 to 1.066)                    | < 0.0001 |
|                               | SmartFFR                    | 4.828 (1.712 to 13.617)                 | 0.0029   | 2.092 (0.445 to 9.839)                    | 0.3503   |
| Plaque burden increase by 20% | Age                         | 1.035 (1.006 to 1.065)                  | 0.0175   | 1.072 (1.033 to 1.112)                    | 0.0002   |
|                               | Cer_d18_1_16_0              | 1.129 (1.033 to 1.234)                  | 0.0076   | 1.046 (0.923 to 1.186)                    | 0.4787   |
|                               | CE_18_3                     | 1.008 (1.000 to 1.016)                  | 0.0478   | 1.005 (0.988 to 1.022)                    | 0.5675   |
|                               | CE_20_3                     | 1.025 (1.002 to 1.048)                  | 0.0325   | 1.012 (0.974 to 1.052)                    | 0.5387   |
|                               | PC_36_0                     | 1.041 (0.999 to 1.085)                  | 0.0563   | 1.007 (0.958 to 1.058)                    | 0.7755   |
|                               | TG_54_2__TG_18_1_18_1_1_8_0 | 1.008 (1.001 to 1.016)                  | 0.0275   | 1.006 (0.997 to 1.015)                    | 0.2157   |
|                               | SM_40_1                     | 1.010 (0.998 to 1.022)                  | 0.0905   | 1.004 (0.967 to 1.043)                    | 0.8339   |
|                               | SM_41_1                     | 1.012 (0.999 to 1.026)                  | 0.0679   | 1.018 (0.981 to 1.056)                    | 0.3544   |

| Dependent Variable | Effect                 | Univariate Logistic Regression Analysis |                 | Multivariate Logistic Regression Analysis |                 |
|--------------------|------------------------|-----------------------------------------|-----------------|-------------------------------------------|-----------------|
|                    |                        | Odds Ratio                              | <i>p</i> -Value | Odds Ratio                                | <i>p</i> -Value |
|                    | SM_42_4                | 1.104 (1.002 to 1.217)                  | 0.0449          | 1.029 (0.879 to 1.204)                    | 0.7239          |
|                    | SM_42_1                | 1.013 (1.002 to 1.025)                  | 0.0227          | 1.021 (0.991 to 1.053)                    | 0.1752          |
|                    | Baseline plaque burden | 1.051 (1.041 to 1.061)                  | < 0.0001        | 1.049 (1.035 to 1.063)                    | < 0.0001        |
|                    | SmartFFR               | 5.456 (1.852 to 16.072)                 | 0.0021          | 1.736 (0.393 to 7.665)                    | 0.4667          |
